# Supplementary material
Source: publisher site journal article supplement (https://www.dovepress.com/article/292233)

**Supplemental Figure 1**： Kaplan-Meier curves for 5-year BCSS(A), 10-year BCSS(B), 5-year OS(C), and 10-year OS(D)


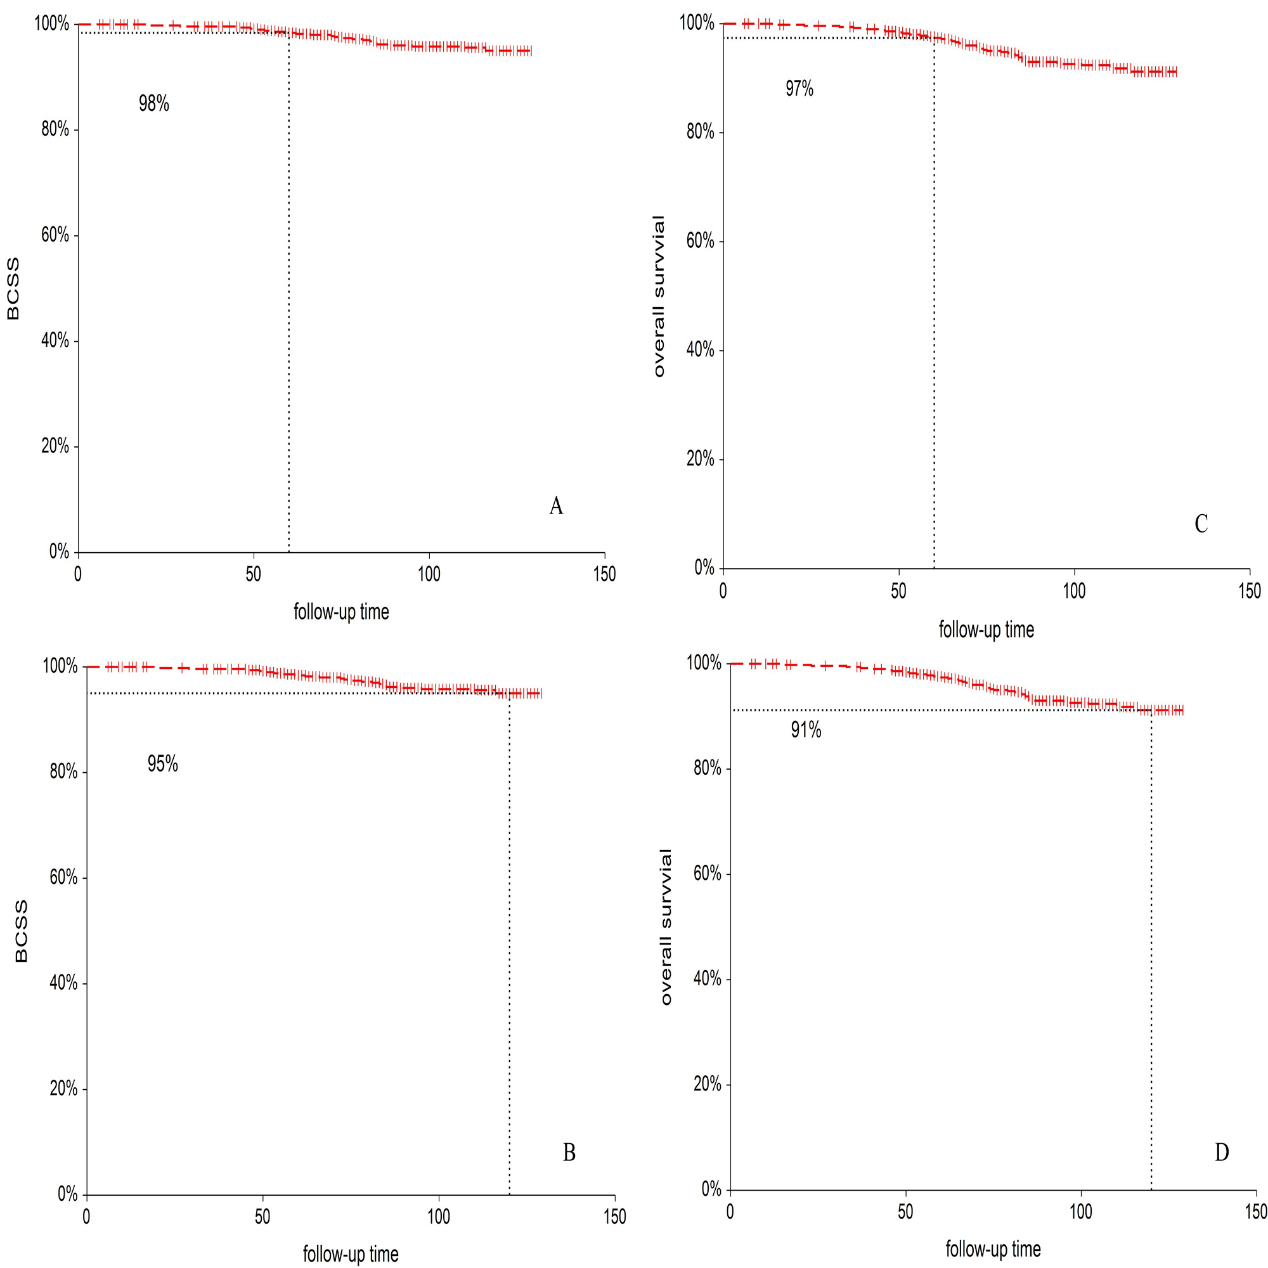


**Supplemental figure 2:** Cumulative incidence of 5-year LRR (A), 10-year LRR(B), 5-year DM(C), and 10-year DM(D)


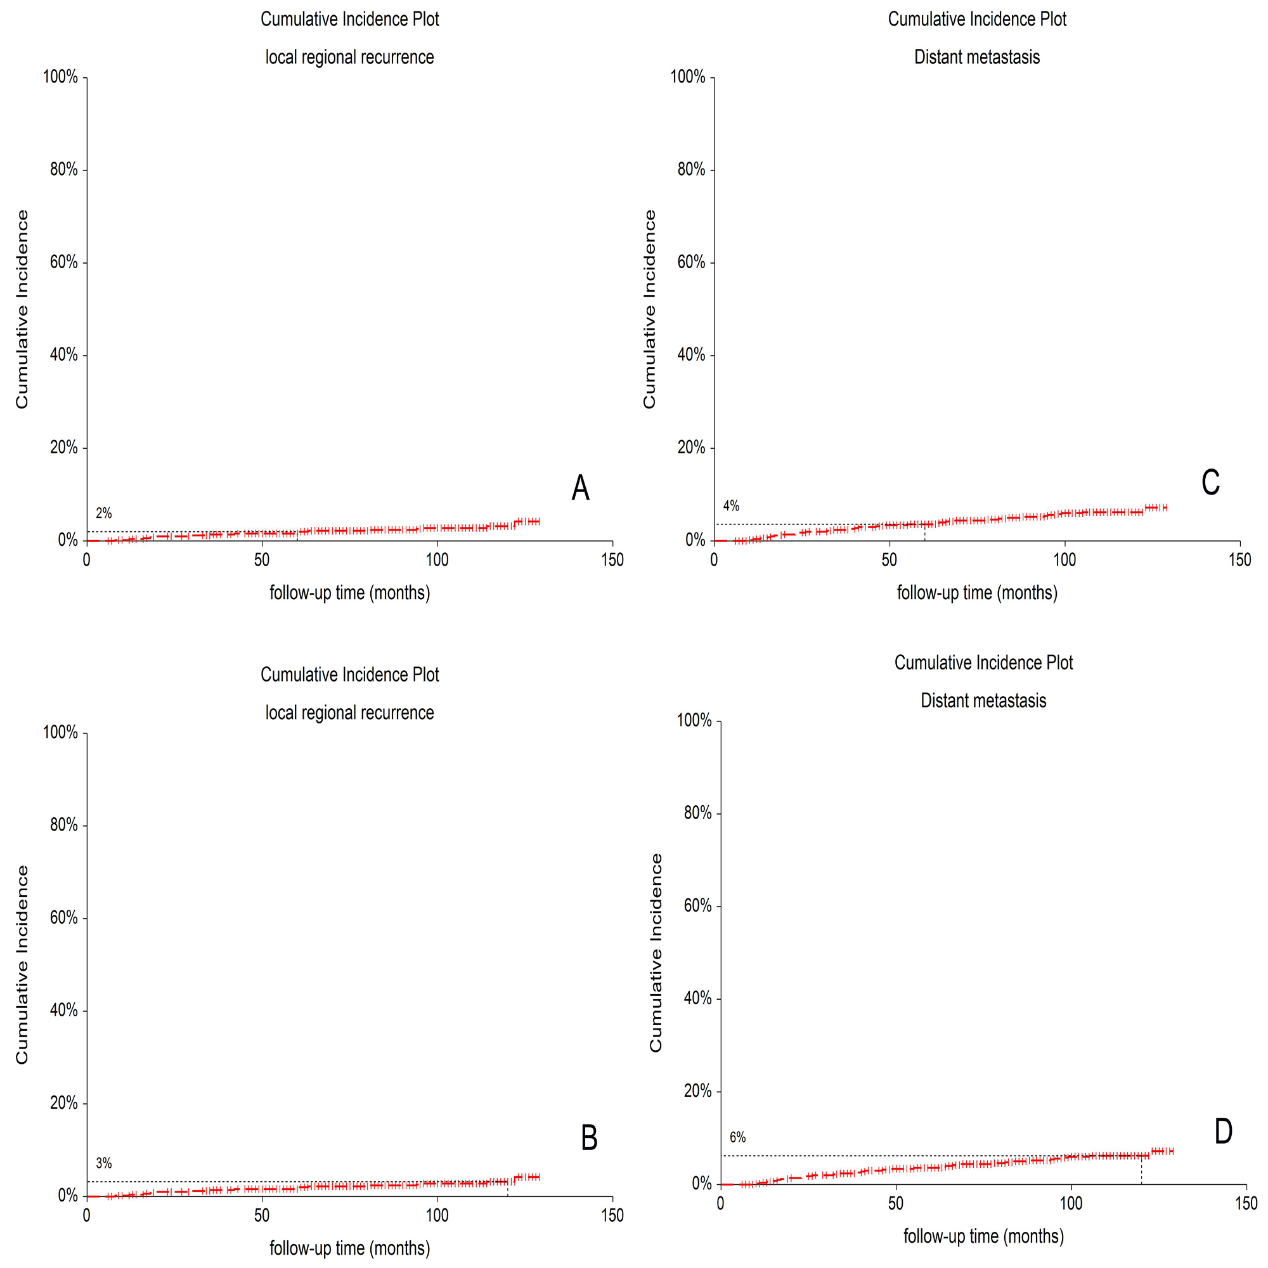


**Supplemental figure 3:** Kaplan-Meier curves for 5-year OS(A) and 5-year BCSS(B) in the external validation cohorts. Cumulative incidence of 5-year LRR (C) and 5-year DM(D) in the external validation cohorts.


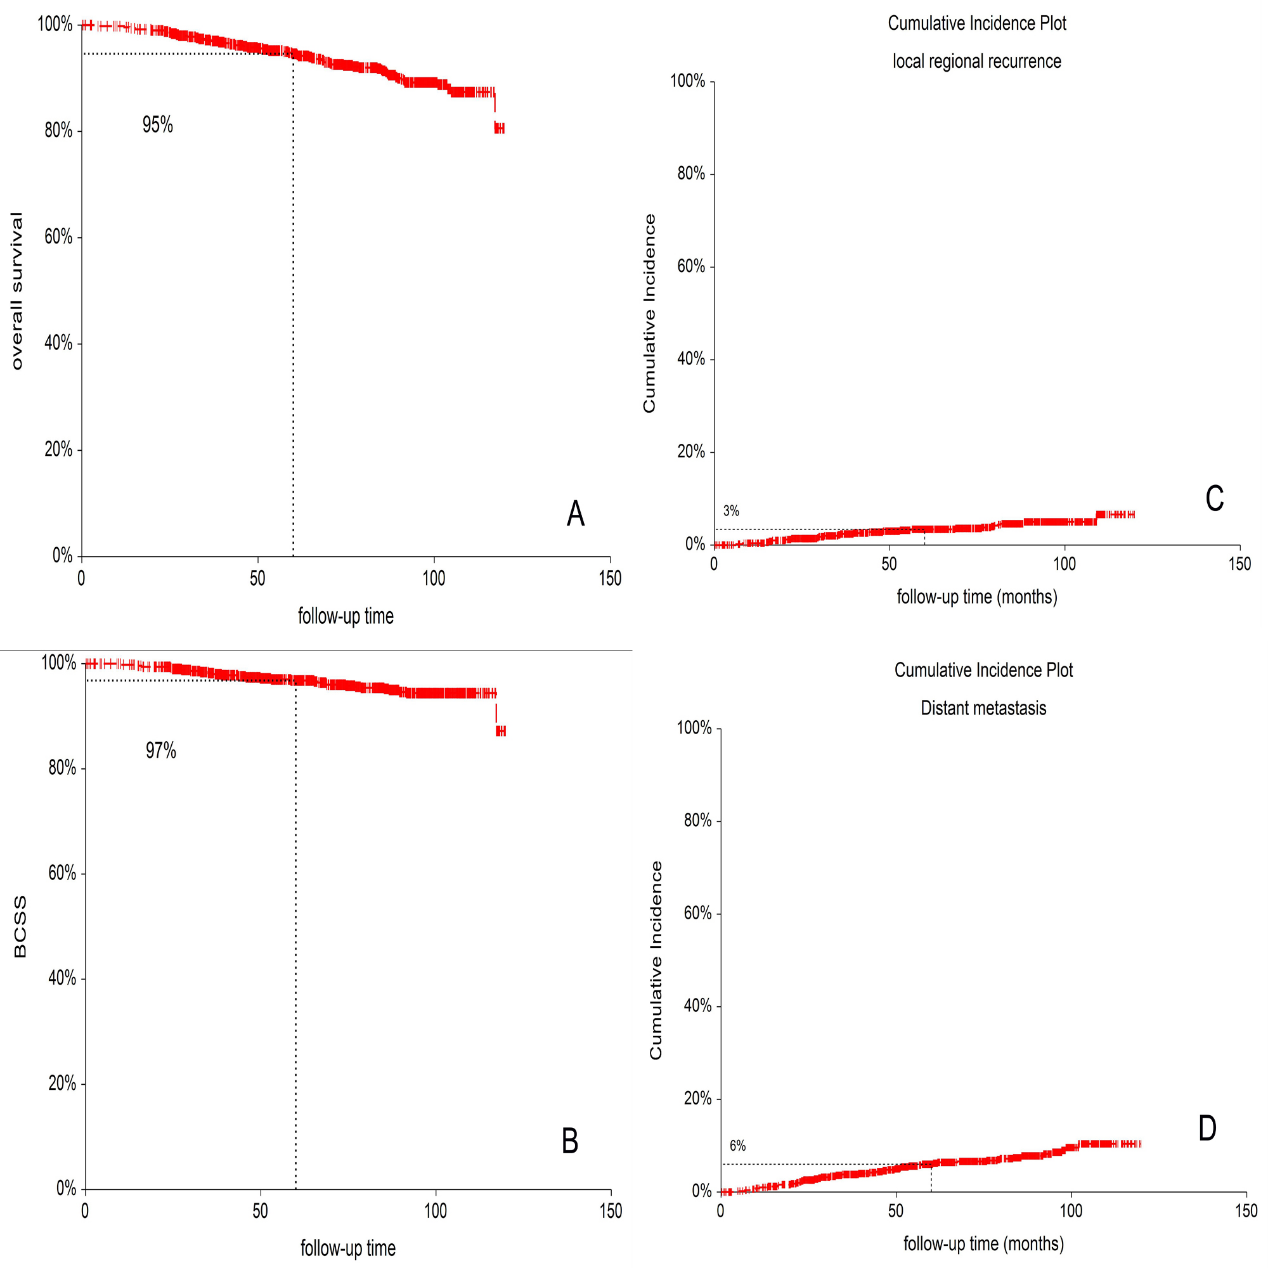

Supplement: Supplementary file 1 [file get_supplementary_file.php]
